# Supplementary material for: Differential responses on energy metabolic pathway reprogramming between genotoxic and non-genotoxic hepatocarcinogens in rat liver cells
Source: PubMed Central journal article supplement — J Toxicol Pathol. 2019 Jul 28;32(4):261–74. doi: 10.1293/tox.2019-0048 (PMC6831489; doi:10.1293/tox.2019-0048), 2019-07-28
Supplement: tox-32-261-s001.pdf [file tox-32-261-s001.pdf]

**Supplementary Table 1**  
**Sequence of primers used for real-time RT-PCR analysis**

| Accession No. | Gene symbol    | Forward primer (5'→3')     | Reverse primer (5'→3')     |
|---------------|----------------|----------------------------|----------------------------|
| NM_001077643  | <i>Mpc2</i>    | GGCCAGACCT GCAGAGAAAC T    | CCAAATAAAC CCTGTAGCCA TCAG |
| NM_134364     | <i>Atp5f1b</i> | AAAGAATCAC CACCACCAAG AAG  | TCATCAGCTG GCACATAGAT AGC  |
| NM_012915     | <i>Atp5if1</i> | CAGCTGGCTG CTTGAAGA        | CCGTTTCGATC TGTTTTTGCA     |
| NM_138827     | <i>Slc2a1</i>  | TTGCTGTGGC TGGCTTCTC       | GCCACACAGT TGCTCCACAT      |
| NM_012879     | <i>Slc2a2</i>  | TTCATCATCG CCCTCTGCTT      | GCAAAAAGGA AGAACACGTA AGG  |
| NM_012734     | <i>Hk1</i>     | TCGGCGGGTC TTCCTTTC        | CGTTCTGGTT CTTCTCGTGG TT   |
| NM_012735     | <i>Hk2</i>     | TCAGCCCAGA ACTCCTTACC A    | CGATTCCATC CTTATCCTCT TCA  |
| NM_022179     | <i>Hk3</i>     | CCATCAACCC AGGCAAACA       | ACGATCTCCC CCAGGTACAT T    |
| NM_012624     | <i>Pklr</i>    | ACCAGCATCA TTGCCACCAT      | GCAATGTTCA TCCCTGCTTT G    |
| NM_053297     | <i>Pkm</i>     | TCATCAGCAA AATCGAGAAC CA   | CCACGAGCTA CCATGATTCC A    |
| NM_017006     | <i>G6pd</i>    | CTGCACAAGA TTGATCGAGA GAAG | GGACCTCGGC TGCCATAGA       |
| NM_175758     | <i>Slc1a5</i>  | TTATGTGGTA CGCCCCCATT      | GAGCTGGCGG ATGTCTTTCA      |
| NM_012569     | <i>Gls</i>     | CCTGAGGCCG TTCGGAATA       | AATGCAAACCT GCCCTGAGAA GT  |
| NM_001109968  | <i>Gls</i>     | CCTGAGGCCG TTCGGAATA       | AATGCAAACCT GCCCTGAGAA GT  |
| NM_012603     | <i>Myc</i>     | GACAGCAGCT CGCCCAAAT       | GCGAGTCCGA GGAAGAAGAG A    |
| NM_030989     | <i>Tp53</i>    | CCCTTCACTG CCTTTTTTTA CCT  | GCCAGGAACC AGTTTGCATA G    |
| NM_031144     | <i>Actb</i>    | CCCTGGCTCC TAGCACCAT       | AGAGCCACCA ATCCACACAG A    |
| NM_012583     | <i>Hprt1</i>   | GTCAAGCAGT ACAGCCCCAA A    | CAACACTTCG AGAGGTCCTT TTC  |

Abbreviations: *Actb*, actin, beta; *Atp5f1b*, ATP synthase F<sub>1</sub> subunit beta; *Atp5if1*, ATP synthase inhibitory factor subunit 1; *G6pd*, glucose-6-phosphate dehydrogenase; *Gls*, glutaminase; *Hk*, hexokinase; *Hprt1*, hypoxanthine phosphoribosyltransferase 1; *Mpc2*, mitochondrial pyruvate carrier 2; *Myc*, MYC proto-oncogene, bHLH transcription factor; *Pklr*, pyruvate kinase, liver and red blood cell; *Pkm*, pyruvate kinase M1/2; RT-PCR, reverse transcription-polymerase chain reaction; *Slc1a5*, solute carrier family 1 member 5; *Slc2a1*, solute carrier family 2 member 1; *Slc2a2*, solute carrier family 2 member 2; *Tp53*, tumor protein p53.

**Supplementary Table 2**  
**Immunohistochemical methodology**

| Antigen | Antibody type                | Dilution | Antigen retrieval                                                          | Source                                            | Catalog. No.  |
|---------|------------------------------|----------|----------------------------------------------------------------------------|---------------------------------------------------|---------------|
| GST-P   | Rabbit polyclonal            | 1:1000   | None                                                                       | Medical & Biological Laboratories (Nagoya, Japan) | 311           |
| ATPB    | Mouse monoclonal, clone 3D5  | 1:400    | Autoclaving at 121°C for 10 min in Dako target retrieval solution (pH 9.0) | Abcam plc (Cambridge, UK)                         | ab14730       |
| GLUT1   | Rabbit polyclonal            | 1:250    | Autoclaving at 121°C for 10 min in Dako target retrieval solution (pH 9.0) | Abcam plc                                         | ab115730      |
| G6PD    | Goat polyclonal              | 1:500    | Autoclaving at 121°C for 10 min in Dako target retrieval solution (pH 9.0) | Novus Biologicals (Littleton, CO, NB100-0954 USA) |               |
| PKLR    | Rabbit polyclonal            | 1:1000   | None                                                                       | Thermo Fisher Scientific (Rockford, IL, USA)      | PA5-22178     |
| PKM2    | Rabbit polyclonal            | 1:500    | Microwaving at 90°C for 10 min in Dako target retrieval solution (pH 9.0)  | Thermo Fisher Scientific                          | PA5-29339     |
| SLC1A5  | Rabbit polyclonal            | 1:100    | Microwaving at 90°C for 10 min in Dako target retrieval solution (pH 9.0)  | LifeSpan BioSciences, Inc. (Seattle, WA, USA)     | LS-C31887-100 |
| c-MYC   | Rabbit monoclonal, clone Y69 | 1:500    | Autoclaving at 121°C for 10 min in Dako target retrieval solution (pH 9.0) | Abcam plc                                         | ab32072       |

Abbreviations: ATPB, ATP synthase subunit beta, mitochondrial precursor; GLUT1, solute carrier family 2, facilitated glucose transporter member 1; G6PD, glucose-6-phosphate 1-dehydrogenase; GST-P, glutathione *S*-transferase placental form; MYC, myc proto-oncogene protein; PKLR, pyruvate kinase, liver and red blood cell; PKM2, pyruvate kinase isozyme M2; SLC1A5, neutral amino acid transporter B (0).

**Supplementary Table 3**

**Transcript expression levels in the liver of rats treated with genotoxic or non-genotoxic hepatocarcinogens relative to untreated controls after 28 days of treatment in Experiment 1**

|                                       | Relative transcript level normalized to <i>Actb</i> |             |                  | Relative transcript level normalized to <i>Hprt1</i> |             |                  |
|---------------------------------------|-----------------------------------------------------|-------------|------------------|------------------------------------------------------|-------------|------------------|
|                                       | CONT                                                | DEN         | CCl <sub>4</sub> | CONT                                                 | DEN         | CCl <sub>4</sub> |
| OXPHOS-related molecules              |                                                     |             |                  |                                                      |             |                  |
| <i>Mpc2</i>                           | 1.04±0.31                                           | 1.17±0.37   | 0.65±0.17        | 1.03±0.25                                            | 1.33±0.35   | 1.10±0.22        |
| <i>Atp5flb</i>                        | 1.02±0.18                                           | 1.11±0.16   | 0.42±0.07**      | 1.02±0.21                                            | 1.28±0.19   | 0.72±0.05        |
| <i>Atp5ifl</i>                        | 1.03±0.24                                           | 1.43±0.23*  | 1.36±0.26        | 1.03±0.24                                            | 1.65±0.27** | 2.31±0.33**      |
| Glycolysis- and PPP-related molecules |                                                     |             |                  |                                                      |             |                  |
| <i>Slc2a1</i>                         | 1.08±0.46                                           | 0.78±0.14   | 0.33±0.05**      | 1.08±0.41                                            | 0.90±0.14   | 0.57±0.06        |
| <i>Slc2a2</i>                         | 1.02±0.22                                           | 0.97±0.15   | 0.44±0.09**      | 1.03±0.24                                            | 1.11±0.11   | 0.76±0.10*       |
| <i>Hk1</i>                            | 1.05±0.34                                           | 1.71±0.69   | 2.66±1.12**      | 1.10±0.52                                            | 1.80±0.54   | 3.98±1.12**      |
| <i>Hk2</i>                            | 1.08±0.51                                           | 1.59±0.77   | 4.07±0.76**      | 1.13±0.67                                            | 1.69±0.63   | 6.32±1.34**      |
| <i>Hk3</i>                            | 1.03±0.25                                           | 1.79±0.48** | 1.79±0.38**      | 1.06±0.40                                            | 1.94±0.44   | 2.83±0.94**      |
| <i>Pklr</i>                           | 1.04±0.31                                           | 0.86±0.19   | 0.21±0.08**      | 1.05±0.32                                            | 1.00±0.26   | 0.35±0.12**      |
| <i>Pkm</i>                            | 1.04±0.31                                           | 1.82±0.25*  | 5.04±0.74**      | 1.07±0.40                                            | 2.10±0.32** | 8.82±2.46**      |
| <i>G6pd</i>                           | 1.05±0.36                                           | 0.95±0.30   | 0.80±0.27        | 1.11±0.53                                            | 1.02±0.25   | 1.21±0.33        |
| Glutaminolysis-related molecules      |                                                     |             |                  |                                                      |             |                  |
| <i>Slc1a5</i>                         | 1.05±0.31                                           | 2.17±0.52** | 5.68±1.48**      | 1.10±0.49                                            | 2.38±0.63*  | 9.02±3.57**      |
| <i>Gls</i>                            | 1.02±0.22                                           | 1.22±0.34   | 2.09±0.53**      | 1.06±0.39                                            | 1.32±0.35   | 3.26±1.02**      |
| Metabolic regulators                  |                                                     |             |                  |                                                      |             |                  |
| <i>Myc</i>                            | 1.25±0.85                                           | 1.77±0.98   | 1.93±0.29        | 1.24±0.88                                            | 2.08±1.27   | 3.36±0.88**      |
| <i>Tp53</i>                           | 1.03±0.23                                           | 1.12±0.13   | 0.90±0.13        | 1.04±0.27                                            | 1.31±0.29   | 1.54±0.22**      |

Abbreviations: *Actb*, actin, beta; *Atp5flb*, ATP synthase F<sub>1</sub> subunit beta; *Atp5ifl*, ATP synthase inhibitory factor subunit 1; CCl<sub>4</sub>, carbon tetrachloride; CONT, untreated controls; DEN, *N*-nitrosodiethylamine; *G6pd*, glucose-6-phosphate dehydrogenase; *Gls*, glutaminase; *Hk*, hexokinase; *Hprt1*, hypoxanthine phosphoribosyltransferase 1; *Mpc2*, mitochondrial pyruvate carrier 2; *Myc*, MYC proto-oncogene, bHLH transcription factor; OXPHOS, oxidative phosphorylation; *Pklr*, pyruvate kinase, liver and red blood cell; *Pkm*, pyruvate kinase M1/2; PPP, pentose phosphate pathway; *Slc1a5*, solute carrier family 1 member 5; *Slc2a1*, solute carrier family 2 member 1; *Slc2a2*, solute carrier family 2 member 2; *Tp53*, tumor protein p53.

Data are expressed as the mean ± SD.

\**P* < 0.05, significantly different from untreated controls by Dunnett's or Steel's test.

\*\**P* < 0.01, significantly different from untreated controls by Dunnett's or Steel's test.

**Supplementary Table 4**

**Transcript expression levels in the liver of rats treated with genotoxic or non-genotoxic hepatocarcinogens relative to untreated controls after 84 days of treatment in Experiment 1**

|                                       | Relative transcript level normalized to <i>Actb</i> |             |                  | Relative transcript level normalized to <i>Hprt1</i> |             |                  |
|---------------------------------------|-----------------------------------------------------|-------------|------------------|------------------------------------------------------|-------------|------------------|
|                                       | CONT                                                | DEN         | CCl <sub>4</sub> | CONT                                                 | DEN         | CCl <sub>4</sub> |
| OXPHOS-related molecules              |                                                     |             |                  |                                                      |             |                  |
| <i>Mpc2</i>                           | 1.06±0.41                                           | 1.39±0.27   | 0.55±0.26*       | 1.07±0.45                                            | 0.90±0.17   | 0.54±0.18*       |
| <i>Atp5f1b</i>                        | 1.01±0.19                                           | 0.95±0.20   | 0.42±0.15**      | 1.01±0.19                                            | 0.61±0.08** | 0.43±0.10**      |
| <i>Atp5if1</i>                        | 1.01±0.18                                           | 3.02±1.12** | 1.32±0.30        | 1.01±0.18                                            | 1.93±0.62** | 1.35±0.26*       |
| Glycolysis- and PPP-related molecules |                                                     |             |                  |                                                      |             |                  |
| <i>Slc2a1</i>                         | 1.04±0.30                                           | 2.08±0.27** | 1.46±0.90        | 1.02±0.25                                            | 1.34±0.07   | 1.76±1.77        |
| <i>Slc2a2</i>                         | 1.02±0.21                                           | 0.98±0.08   | 0.46±0.20**      | 1.02±0.24                                            | 0.63±0.04** | 0.45±0.15**      |
| <i>Hk1</i>                            | 1.08±0.54                                           | 2.89±0.88*  | 4.61±1.38**      | 1.06±0.45                                            | 1.89±0.62   | 4.61±0.73**      |
| <i>Hk2</i>                            | 1.06±0.41                                           | 2.29±0.77*  | 4.98±1.70**      | 1.05±0.35                                            | 1.46±0.43   | 5.72±4.09**      |
| <i>Hk3</i>                            | 1.05±0.34                                           | 2.47±0.59** | 1.88±0.48*       | 1.04±0.30                                            | 1.59±0.38*  | 1.89±0.31**      |
| <i>Pklr</i>                           | 1.04±0.26                                           | 0.78±0.12   | 0.14±0.07**      | 1.04±0.29                                            | 0.50±0.07** | 0.13±0.06**      |
| <i>Pkm</i>                            | 1.02±0.23                                           | 1.77±0.29*  | 4.27±1.17**      | 1.03±0.25                                            | 1.15±0.24   | 4.39±1.07**      |
| <i>G6pd</i>                           | 1.04±0.32                                           | 4.84±3.09** | 0.98±0.35        | 1.03±0.25                                            | 3.05±1.76** | 0.98±0.22        |
| Glutaminolysis-related molecules      |                                                     |             |                  |                                                      |             |                  |
| <i>Slc1a5</i>                         | 1.03±0.29                                           | 1.78±0.26** | 3.93±0.82**      | 1.03±0.27                                            | 1.15±0.14   | 4.11±1.10**      |
| <i>Gls</i>                            | 1.05±0.36                                           | 1.58±0.32   | 2.69±0.51**      | 1.04±0.33                                            | 1.02±0.17   | 2.79±0.59**      |
| Metabolic regulators                  |                                                     |             |                  |                                                      |             |                  |
| <i>Myc</i>                            | 1.03±0.28                                           | 3.08±1.92*  | 1.89±0.45*       | 1.02±0.23                                            | 1.95±1.11*  | 2.07±1.02*       |
| <i>Tp53</i>                           | 1.00±0.10                                           | 1.05±0.33   | 0.67±0.24        | 1.00±0.10                                            | 0.67±0.17*  | 0.68±0.24*       |

Abbreviations: *Actb*, actin, beta; *Atp5f1b*, ATP synthase F<sub>1</sub> subunit beta; *Atp5if1*, ATP synthase inhibitory factor subunit 1; CCl<sub>4</sub>, carbon tetrachloride; CONT, untreated controls; DEN, *N*-nitrosodiethylamine; *G6pd*, glucose-6-phosphate dehydrogenase; *Gls*, glutaminase; *Hk*, hexokinase; *Hprt1*, hypoxanthine phosphoribosyltransferase 1; *Mpc2*, mitochondrial pyruvate carrier 2; *Myc*, MYC proto-oncogene, bHLH transcription factor; OXPHOS, oxidative phosphorylation; *Pklr*, pyruvate kinase, liver and red blood cell; *Pkm*, pyruvate kinase M1/2; PPP, pentose phosphate pathway; *Slc1a5*, solute carrier family 1 member 5; *Slc2a1*, solute carrier family 2 member 1; *Slc2a2*, solute carrier family 2 member 2; *Tp53*, tumor protein p53.

Data are expressed as the mean ± SD.

\**P* < 0.05, significantly different from untreated controls by Dunnett's or Steel's test.

\*\**P* < 0.01, significantly different from untreated controls by Dunnett's or Steel's test.

**Supplementary Table 5****Transcript expression levels in the liver of rats treated with genotoxic or non-genotoxic hepatocarcinogens relative to untreated controls after 28 days of treatment in Experiment 2**

|                                       | Relative transcript level normalized to <i>Actb</i>  |                  |               |               |               |               |
|---------------------------------------|------------------------------------------------------|------------------|---------------|---------------|---------------|---------------|
|                                       | CONT                                                 | AFB <sub>1</sub> | NPYR          | CRB           | TAA           | MP            |
| OXPHOS-related molecules              |                                                      |                  |               |               |               |               |
| <i>Mpc2</i>                           | 1.14±0.73                                            | 0.10 ± 0.02*     | 0.13 ± 0.02*  | 0.51 ± 0.37   | 0.15 ± 0.03*  | 0.30 ± 0.13*  |
| <i>Atp5flb</i>                        | 1.01 ± 0.12                                          | 0.58 ± 0.03*     | 0.69 ± 0.04*  | 0.77 ± 0.15   | 0.36 ± 0.08*  | 0.47 ± 0.12*  |
| <i>Atp5ifl</i>                        | 1.00 ± 0.10                                          | 0.43 ± 0.05*     | 0.49 ± 0.06*  | 0.69 ± 0.51   | 1.27 ± 0.21   | 1.24 ± 0.34   |
| Glycolysis- and PPP-related molecules |                                                      |                  |               |               |               |               |
| <i>Slc2a1</i>                         | 1.02 ± 0.24                                          | 0.80 ± 0.24      | 0.58 ± 0.22*  | 0.91 ± 0.26   | 0.45 ± 0.14** | 0.97 ± 0.35   |
| <i>Slc2a2</i>                         | 1.01 ± 0.18                                          | 0.65 ± 0.05*     | 0.88 ± 0.09   | 0.64 ± 0.06*  | 0.55 ± 0.08*  | 0.68 ± 0.20   |
| <i>Hk1</i>                            | 1.01 ± 0.13                                          | 1.37 ± 0.24      | 1.56 ± 0.23*  | 1.59 ± 0.70   | 0.94 ± 0.15   | 1.94 ± 0.66*  |
| <i>Hk2</i>                            | 1.07 ± 0.40                                          | 1.57 ± 0.20      | 1.88 ± 0.47** | 2.35 ± 0.68** | 1.02 ± 0.23   | 1.68 ± 0.27   |
| <i>Hk3</i>                            | 1.09 ± 0.49                                          | 1.06 ± 0.10      | 1.26 ± 0.12   | 1.53 ± 0.51   | 0.52 ± 0.12*  | 0.69 ± 0.10   |
| <i>Pklr</i>                           | 1.04 ± 0.32                                          | 0.96 ± 0.06      | 1.03 ± 0.18   | 1.57 ± 0.54   | 0.09 ± 0.02*  | 0.13 ± 0.07*  |
| <i>Pkm</i>                            | 1.02 ± 0.20                                          | 1.28 ± 0.17      | 1.41 ± 0.16   | 1.94 ± 0.98   | 0.82 ± 0.16   | 1.20 ± 0.15   |
| <i>G6pd</i>                           | 1.05 ± 0.40                                          | 0.58 ± 0.17      | 0.82 ± 0.24   | 1.17 ± 0.34   | 1.36 ± 0.33   | 0.86 ± 0.47   |
| Glutaminolysis-related molecules      |                                                      |                  |               |               |               |               |
| <i>Slc1a5</i>                         | 1.02 ± 0.21                                          | 2.32 ± 0.45*     | 1.88 ± 0.26*  | 1.64 ± 0.06*  | 4.64 ± 0.63*  | 7.04 ± 1.37*  |
| <i>Gls</i>                            | 1.04 ± 0.32                                          | 1.36 ± 0.30      | 1.80 ± 0.33*  | 1.46 ± 0.21   | 2.91 ± 0.37*  | 2.96 ± 1.20*  |
| Metabolic regulators                  |                                                      |                  |               |               |               |               |
| <i>Myc</i>                            | 1.04 ± 0.30                                          | 1.05 ± 0.57      | 0.53 ± 0.38   | 2.04 ± 1.36   | 2.55 ± 0.71*  | 3.66 ± 1.96*  |
| <i>Tp53</i>                           | 1.00 ± 0.09                                          | 0.65 ± 0.06*     | 0.70 ± 0.16*  | 0.99 ± 0.22   | 1.45 ± 0.15*  | 1.64 ± 0.35*  |
|                                       | Relative transcript level normalized to <i>Hprt1</i> |                  |               |               |               |               |
|                                       | CONT                                                 | AFB <sub>1</sub> | NPYR          | CRB           | TAA           | MP            |
| OXPHOS-related molecules              |                                                      |                  |               |               |               |               |
| <i>Mpc2</i>                           | 1.12 ± 0.62                                          | 0.06 ± 0.01*     | 0.07 ± 0.01*  | 0.58 ± 0.40   | 0.14 ± 0.05*  | 0.23 ± 0.09*  |
| <i>Atp5flb</i>                        | 1.01 ± 0.16                                          | 0.61 ± 0.05**    | 0.65 ± 0.07** | 1.48 ± 0.14** | 0.47 ± 0.11** | 0.47 ± 0.11** |
| <i>Atp5ifl</i>                        | 1.01 ± 0.11                                          | 0.25 ± 0.02*     | 0.26 ± 0.03*  | 0.73 ± 0.44   | 1.16 ± 0.32   | 0.97 ± 0.22   |
| Glycolysis- and PPP-related molecules |                                                      |                  |               |               |               |               |
| <i>Slc2a1</i>                         | 1.03 ± 0.25                                          | 0.81 ± 0.17      | 0.53 ± 0.16*  | 1.77 ± 0.43** | 0.57 ± 0.19*  | 0.97 ± 0.34   |
| <i>Slc2a2</i>                         | 1.02 ± 0.19                                          | 0.68 ± 0.05*     | 0.83 ± 0.11   | 0.77 ± 0.16   | 0.70 ± 0.05*  | 0.68 ± 0.18   |
| <i>Hk1</i>                            | 1.01 ± 0.15                                          | 1.42 ± 0.22*     | 1.45 ± 0.22*  | 3.02 ± 3.02*  | 1.21 ± 0.30   | 2.01 ± 0.87*  |
| <i>Hk2</i>                            | 1.05 ± 0.33                                          | 1.63 ± 0.19      | 1.76 ± 0.47*  | 2.69 ± 2.69** | 1.32 ± 0.41   | 1.75 ± 0.61*  |
| <i>Hk3</i>                            | 1.04 ± 0.30                                          | 1.10 ± 0.10      | 1.19 ± 0.16   | 1.77 ± 1.77   | 0.68 ± 0.25   | 0.71 ± 0.22   |
| <i>Pklr</i>                           | 1.01 ± 0.15                                          | 1.01 ± 0.17      | 0.96 ± 0.18   | 3.05 ± 0.97*  | 0.11 ± 0.03*  | 0.13 ± 0.07*  |
| <i>Pkm</i>                            | 1.01 ± 0.12                                          | 1.32 ± 0.14*     | 1.32 ± 0.19*  | 3.68 ± 1.51*  | 1.06 ± 0.28   | 1.22 ± 0.30   |
| <i>G6pd</i>                           | 1.02 ± 0.24                                          | 0.62 ± 0.23      | 0.77 ± 0.23   | 1.37 ± 0.41   | 1.79 ± 0.70*  | 0.94 ± 0.66   |
| Glutaminolysis-related molecules      |                                                      |                  |               |               |               |               |
| <i>Slc1a5</i>                         | 1.02 ± 0.23                                          | 2.43 ± 0.61*     | 1.76 ± 0.28*  | 1.95 ± 0.35*  | 5.47 ± 1.45*  | 7.91 ± 2.38*  |
| <i>Gls</i>                            | 1.00 ± 0.09                                          | 1.40 ± 0.24      | 1.68 ± 0.32*  | 1.69 ± 0.09*  | 3.39 ± 0.58*  | 3.27 ± 1.44*  |
| Metabolic regulators                  |                                                      |                  |               |               |               |               |
| <i>Myc</i>                            | 1.05 ± 0.37                                          | 1.08 ± 0.57      | 0.47 ± 0.27   | 4.12 ± 3.14*  | 3.26 ± 0.95*  | 4.07 ± 3.36*  |
| <i>Tp53</i>                           | 1.02 ± 0.23                                          | 0.68 ± 0.08*     | 0.65 ± 0.12*  | 1.14 ± 0.11   | 1.72 ± 0.43   | 1.80 ± 0.43*  |

Abbreviations: *Actb*, actin, beta; AFB<sub>1</sub>, aflatoxin B<sub>1</sub>; *Atp5flb*, ATP synthase F<sub>1</sub> subunit beta; *Atp5ifl*, ATP synthase inhibitory factor subunit 1; CONT, untreated controls; CRB, carbadox; *G6pd*, glucose-6-phosphate dehydrogenase; *Gls*, glutaminase; *Hk*, hexokinase; *Hprt1*, hypoxanthine phosphoribosyltransferase 1; MP, methapyriline hydrochloride; *Mpc2*, mitochondrial pyruvate carrier 2; *Myc*, MYC proto-oncogene, bHLH transcription factor; NPYR, *N*-nitrosopyrrolidine; OXPHOS, oxidative phosphorylation; *Pklr*, pyruvate kinase, liver and red blood cell; *Pkm*, pyruvate kinase M1/2; PPP, pentose phosphate pathway; *Slc1a5*, solute carrier family 1 member 5; *Slc2a1*, solute carrier family 2 member 1; *Slc2a2*, solute carrier family 2 member 2; TAA, thioacetamide; *Tp53*, tumor protein p53.

Data are expressed as the mean ± SD.

\**P* < 0.05, significantly different from untreated controls by Dunnett's or Steel's test.

\*\**P* < 0.01, significantly different from untreated controls by Dunnett's or Steel's test.

**Supplementary Table 6****Transcript expression levels in the liver of rats treated with genotoxic or non-genotoxic hepatocarcinogens relative to untreated controls after 90 days of treatment in Experiment 2**

|                                       | Relative transcript level normalized to <i>Actb</i>  |                  |             |            |            |             |
|---------------------------------------|------------------------------------------------------|------------------|-------------|------------|------------|-------------|
|                                       | CONT                                                 | AFB <sub>1</sub> | NPYR        | CRB        | TAA        | MP          |
| OXPHOS-related molecules              |                                                      |                  |             |            |            |             |
| <i>Mpc2</i>                           | 1.08±0.48                                            | 0.07±0.02*       | 0.09±0.02*  | 0.46±0.10* | 0.54±0.43  | 0.44±0.14*  |
| <i>Atp5flb</i>                        | 1.01±0.17                                            | 0.71±0.15        | 0.79±0.19   | 1.43±0.45  | 0.48±0.12* | 0.41±0.10*  |
| <i>Atp5ifl</i>                        | 1.07±0.43                                            | 0.87±0.22        | 1.02±0.18   | 1.68±0.39  | 5.73±1.39* | 2.30±0.84   |
| Glycolysis- and PPP-related molecules |                                                      |                  |             |            |            |             |
| <i>Slc2a1</i>                         | 1.03±0.29                                            | 0.86±0.28        | 0.52±0.10*  | 2.05±0.64* | 0.88±0.13  | 0.61±0.14*  |
| <i>Slc2a2</i>                         | 1.01±0.18                                            | 0.99±0.29        | 1.22±0.20   | 0.78±0.18  | 0.63±0.16* | 0.40±0.15** |
| <i>Hk1</i>                            | 1.01±0.14                                            | 1.71±0.35        | 1.94±0.25*  | 2.55±0.93* | 3.06±0.97* | 2.16±1.55*  |
| <i>Hk2</i>                            | 1.03±0.26                                            | 0.93±0.27        | 1.18±0.32   | 0.93±0.29  | 1.82±0.44* | 1.06±0.76   |
| <i>Hk3</i>                            | 1.02±0.26                                            | 0.57±0.08**      | 0.63±0.13** | 1.01±0.11  | 0.86±0.17  | 0.37±0.11** |
| <i>Pklr</i>                           | 1.02±0.24                                            | 1.70±0.47        | 1.69±0.41*  | 0.93±0.32  | 0.12±0.04* | 0.11±0.07*  |
| <i>Pkm</i>                            | 1.00±0.10                                            | 1.27±0.19        | 1.49±0.18*  | 2.21±0.64* | 2.28±0.74* | 1.70±1.17   |
| <i>G6pd</i>                           | 1.02±0.24                                            | 1.23±0.22        | 1.39±0.31   | 0.53±0.25  | 3.31±1.71* | 1.15±0.47   |
| Glutaminolysis-related molecules      |                                                      |                  |             |            |            |             |
| <i>Slc1a5</i>                         | 1.02±0.20                                            | 1.36±0.37        | 1.35±0.23   | 1.06±0.25  | 5.99±2.10* | 2.90±2.30*  |
| <i>Gls</i>                            | 1.03±0.25                                            | 0.80±0.15        | 1.10±0.20   | 0.84±0.17  | 3.12±0.82* | 1.60±1.23   |
| Metabolic regulators                  |                                                      |                  |             |            |            |             |
| <i>Myc</i>                            | 1.08±0.43                                            | 0.80±0.69        | 0.25±0.06*  | 3.14±1.95  | 1.61±0.29  | 1.36±0.49   |
| <i>Tp53</i>                           | 1.01±0.14                                            | 1.15±0.23        | 1.17±0.13   | 0.81±0.22  | 1.15±0.21  | 0.63±0.17** |
|                                       | Relative transcript level normalized to <i>Hprt1</i> |                  |             |            |            |             |
|                                       | CONT                                                 | AFB <sub>1</sub> | NPYR        | CRB        | TAA        | MP          |
| OXPHOS-related molecules              |                                                      |                  |             |            |            |             |
| <i>Mpc2</i>                           | 1.10±0.53                                            | 0.06±0.01*       | 0.07±0.01*  | 0.36±0.10* | 0.34±0.19* | 0.53±0.14   |
| <i>Atp5flb</i>                        | 1.02±0.21                                            | 1.02±0.14        | 1.14±0.06   | 1.92±0.58  | 0.58±0.15* | 0.44±0.16*  |
| <i>Atp5ifl</i>                        | 1.07±0.43                                            | 0.72±0.13        | 0.86±0.09   | 1.31±0.36  | 3.89±1.10* | 2.81±1.07*  |
| Glycolysis- and PPP-related molecules |                                                      |                  |             |            |            |             |
| <i>Slc2a1</i>                         | 1.06±0.40                                            | 1.26±0.48        | 0.77±0.14   | 2.82±1.10* | 1.09±0.34  | 0.73±0.51   |
| <i>Slc2a2</i>                         | 1.02±0.20                                            | 1.44±0.51        | 1.80±0.30** | 0.78±0.26  | 0.78±0.26  | 0.41±0.14** |
| <i>Hk1</i>                            | 1.01±0.16                                            | 2.51±0.88*       | 2.87±0.42*  | 3.52±1.66* | 3.68±1.16* | 2.93±3.50   |
| <i>Hk2</i>                            | 1.02±0.21                                            | 1.30±0.24        | 1.72±0.35*  | 0.96±0.45  | 2.23±0.72* | 1.43±1.71   |
| <i>Hk3</i>                            | 1.02±0.20                                            | 0.83±0.22        | 0.92±0.17   | 1.01±0.18  | 1.05±0.27  | 0.45±0.34** |
| <i>Pklr</i>                           | 1.03±0.30                                            | 2.46±0.86*       | 2.49±0.49*  | 1.26±0.50  | 0.15±0.06* | 0.11±0.07*  |
| <i>Pkm</i>                            | 1.01±0.15                                            | 1.86±0.56*       | 2.20±0.34*  | 2.98±1.06* | 2.73±0.91* | 2.24±2.51   |
| <i>G6pd</i>                           | 1.04±0.33                                            | 1.82±0.60        | 2.09±0.67*  | 0.56±0.36  | 3.79±1.33* | 1.44±1.22   |
| Glutaminolysis-related molecules      |                                                      |                  |             |            |            |             |
| <i>Slc1a5</i>                         | 1.02±0.22                                            | 1.96±0.49*       | 2.01±0.40*  | 1.05±0.23  | 7.38±3.33* | 4.07±5.27*  |
| <i>Gls</i>                            | 1.02±0.22                                            | 1.16±0.31        | 1.62±0.22*  | 0.85±0.27  | 3.79±1.19* | 2.19±2.82   |
| Metabolic regulators                  |                                                      |                  |             |            |            |             |
| <i>Myc</i>                            | 1.08±0.45                                            | 1.12±0.84        | 0.37±0.09*  | 4.18±2.71* | 1.98±0.54  | 1.64±1.15   |
| <i>Tp53</i>                           | 1.01±0.11                                            | 1.69±0.52*       | 1.74±0.37*  | 0.82±0.35  | 1.45±0.55  | 0.72±0.40   |

Abbreviations: *Actb*, actin, beta; AFB<sub>1</sub>, aflatoxin B<sub>1</sub>; *Atp5flb*, ATP synthase F<sub>1</sub> subunit beta; *Atp5ifl*, ATP synthase inhibitory factor subunit 1; CONT, untreated controls; CRB, carbadox; *G6pd*, glucose-6-phosphate dehydrogenase; *Gls*, glutaminase; *Hk*, hexokinase; *Hprt1*, hypoxanthine phosphoribosyltransferase 1; MP, methapyrilene hydrochloride; *Mpc2*, mitochondrial pyruvate carrier 2; *Myc*, MYC proto-oncogene, bHLH transcription factor; NPYR, *N*-nitrosopyrrolidine; OXPHOS, oxidative phosphorylation; *Pklr*, pyruvate kinase, liver and red blood cell; *Pkm*, pyruvate kinase M1/2; PPP, pentose phosphate pathway; *Slc1a5*, solute carrier family 1 member 5; *Slc2a1*, solute carrier family 2 member 1; *Slc2a2*, solute carrier family 2 member 2; TAA, thioacetamide; *Tp53*, tumor protein p53.

Data are expressed as the mean ± SD.

\**P* < 0.05, significantly different from untreated controls by Dunnett's or Steel's test.

\*\**P* < 0.01, significantly different from untreated controls by Dunnett's or Steel's test.

**Supplementary Table 7****Number and area fraction of GST-P<sup>+</sup> liver cell foci in Experiment 1**

| Group            | No. of animals examined | Number (number/cm <sup>2</sup> liver section) | Area fraction (mm <sup>2</sup> /cm <sup>2</sup> liver section) |
|------------------|-------------------------|-----------------------------------------------|----------------------------------------------------------------|
| 28 days          |                         |                                               |                                                                |
| CONT             | 10                      | 0.00±0.00                                     | 0.00±0.00                                                      |
| DEN              | 10                      | 0.00±0.00                                     | 0.00±0.00                                                      |
| CCl <sub>4</sub> | 10                      | 0.13±0.22                                     | 0.01±0.01                                                      |
| 84 days          |                         |                                               |                                                                |
| CONT             | 10                      | 0.00±0.00                                     | 0.00±0.00                                                      |
| DEN              | 10                      | 102.00±39.75**                                | 8.89±4.81**                                                    |
| CCl <sub>4</sub> | 10                      | 3.44±1.48**                                   | 1.24±0.65**                                                    |

Abbreviations: CCl<sub>4</sub>, carbon tetrachloride; CONT, untreated controls; DEN, *N*-nitrosodiethylamine; GST-P, glutathione *S*-transferase placental form.

Data are expressed as the mean ± SD.

\*\**P* < 0.01, significantly different from untreated controls by Dunnett's or Steel's test.

**Supplementary Table 8**  
**Number and area of GST-P<sup>+</sup> liver cell foci in Experiment 2**

| Group            | No. of animals examined | Number (number/cm <sup>2</sup> liver section) | Area fraction (mm <sup>2</sup> /cm <sup>2</sup> liver section) |
|------------------|-------------------------|-----------------------------------------------|----------------------------------------------------------------|
| 28 days          |                         |                                               |                                                                |
| CONT             | 10                      | 0.00±0.00                                     | 0.00±0.00                                                      |
| AFB <sub>1</sub> | 10                      | 0.00±0.00                                     | 0.00±0.00                                                      |
| NPYR             | 10                      | 0.00±0.00                                     | 0.00±0.00                                                      |
| CRB              | 10                      | 0.00±0.00                                     | 0.00±0.00                                                      |
| TAA              | 10                      | 0.80±0.81                                     | 0.06±0.07                                                      |
| MP               | 10                      | 0.00±0.00                                     | 0.00±0.00                                                      |
| 90 days          |                         |                                               |                                                                |
| CONT             | 10                      | 0.00±0.00                                     | 0.00±0.00                                                      |
| AFB <sub>1</sub> | 10                      | 2.22±1.29**                                   | 0.06±0.03**                                                    |
| NPYR             | 10                      | 23.13±5.73**                                  | 0.94±0.35**                                                    |
| CRB              | 10                      | 0.04±0.01                                     | 0.01±0.05                                                      |
| TAA              | 10                      | 22.58±4.21**                                  | 3.24±1.37**                                                    |
| MP               | 10                      | 1.78±1.07**                                   | 0.40±0.28**                                                    |

Abbreviations: AFB<sub>1</sub>, aflatoxin B<sub>1</sub>; CONT, untreated controls; CRB, carbadox; GST-P, glutathione S-transferase placental form; MP, methapyrilene hydrochloride; NPYR, *N*-nitrosopyrrolidine; TAA, thioacetamide.

Data are expressed as the mean ± SD.

\*\**P* < 0.01, significantly different from untreated controls by Dunnett's or Steel's test.
